# Supplementary figures and images for: Assessing the regional impact of Japan’s COVID-19 state of emergency declaration: a population-level observational study using social networking services
Source: HighWire-hosted journal article supplement (doi:10.1136/bmjopen-2020-042002), 2021-02-01

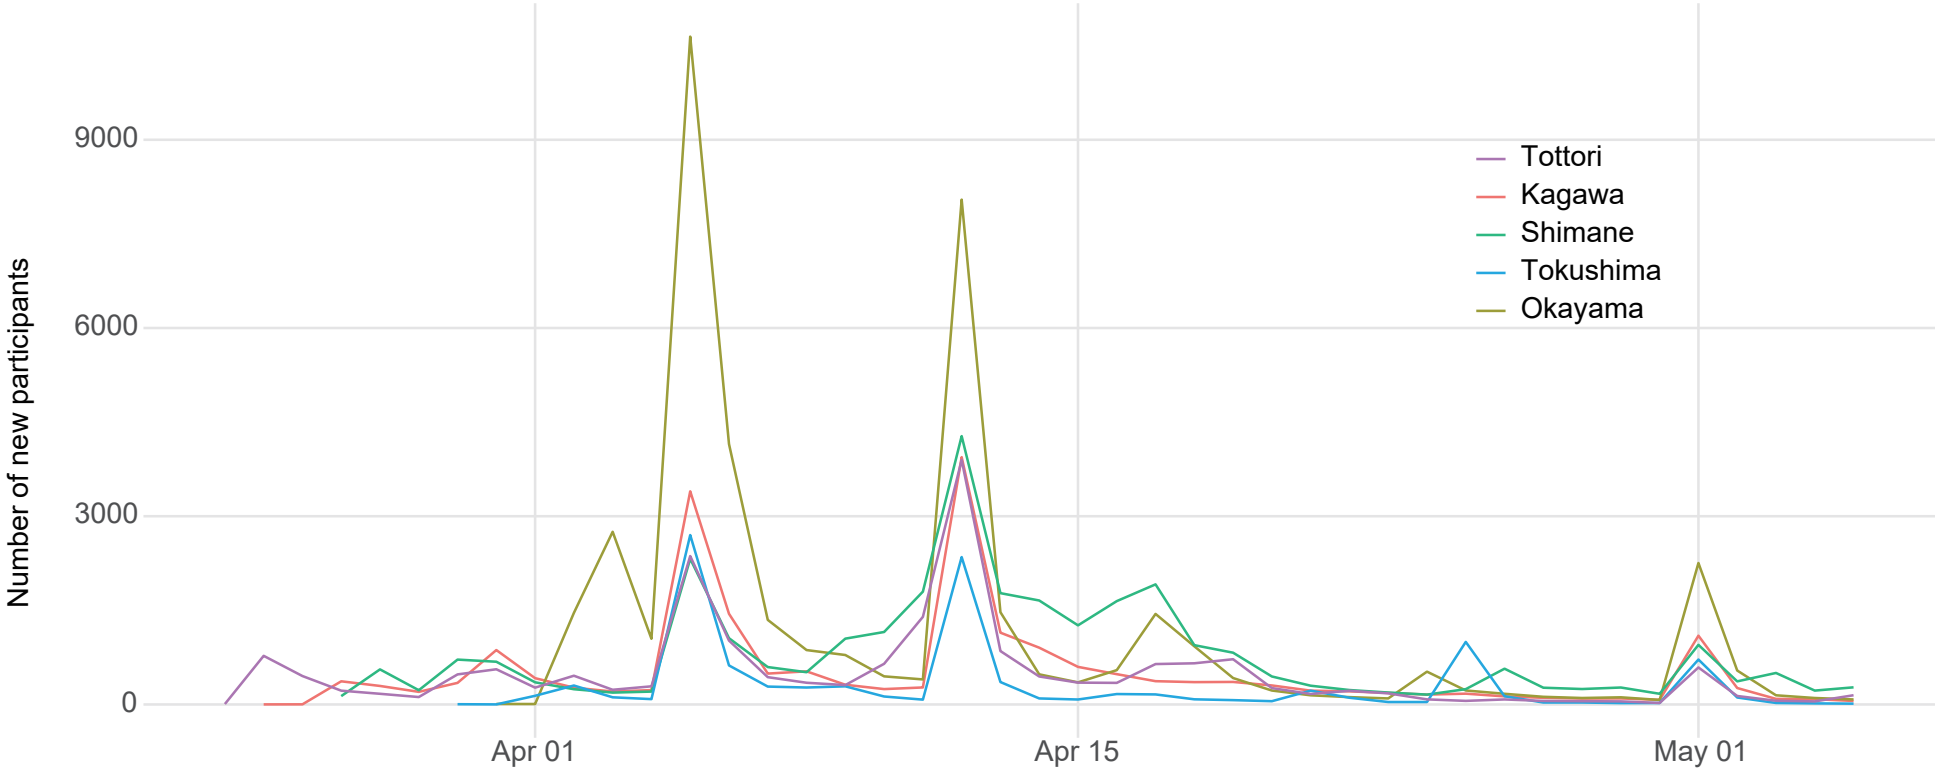

Supplement: bmjopen-2020-042002supp003_data_supplement.pdf [file bmjopen-2020-042002supp003_data_supplement.pdf]
